# Supplementary material
Source: Springer Nature journal article supplement (https://www.springermedizin.de/resource/supplementary/12937_2009_270_MOESM1_ESM.pdf/25654754)

**A.**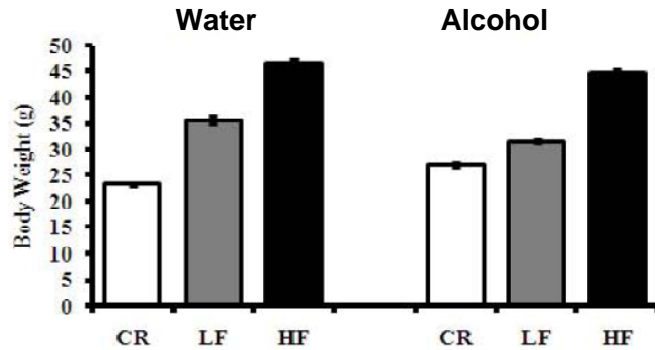**B.**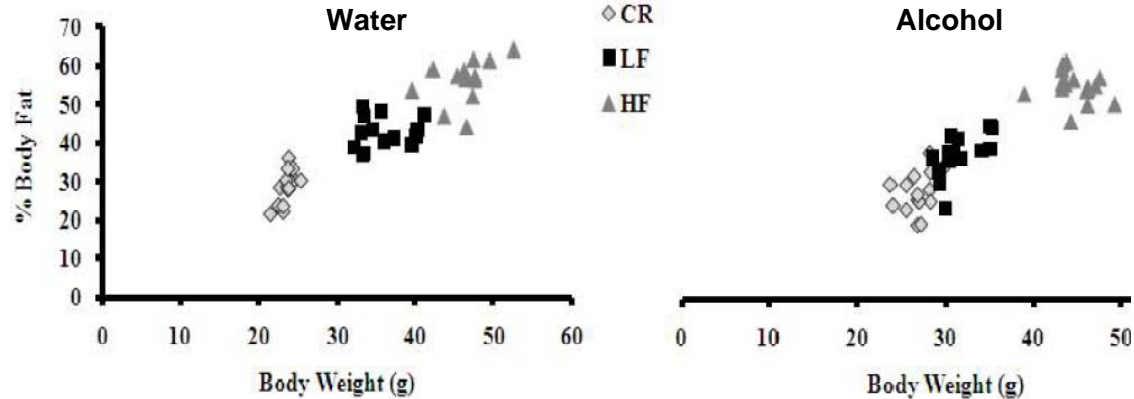

Supplement: MOESM1 [file 25654754]
